# Supplementary material for: Acetic Acid Enhanced Narrow Band Imaging for the Diagnosis of Gastric Intestinal Metaplasia
Source: PLoS One. 2017 Jan 30;12(1):e0170957. doi: 10.1371/journal.pone.0170957 (PMC5279783; doi:10.1371/journal.pone.0170957)
Supplement: S3 File — Minimal data set. (PDF) [file pone.0170957.s006.pdf]

| Minimal data set |        |         |         |                     |                 |                   |                                     |
|------------------|--------|---------|---------|---------------------|-----------------|-------------------|-------------------------------------|
| Patient          | Sex    | Age (y) | WLE     | NBI                 | AA-NBI          | Location          | histological diagnosis              |
| 1                | Male   | 48      | Whitish | bluish-whitish area | whitish patches | antrum and anguli | intestinal metaplasia(AA-NBI,WLE)   |
| 2                | Male   | 76      | Whitish | bluish-whitish area | whitish patches | antrum            | intestinal metaplasia(AA-NBI,WLE)   |
| 3                | Male   | 43      | Whitish | bluish-whitish area | whitish patches | antrum            | intestinal metaplasia(AA-NBI,WLE)   |
| 4                | Male   | 58      | Whitish | bluish-whitish area | whitish patches | antrum            | intestinal metaplasia(AA-NBI,WLE)   |
| 5                | Male   | 55      | Whitish | bluish-whitish area | whitish patches | antrum            | intestinal metaplasia(AA-NBI,WLE)   |
| 6                | Male   | 51      | Reddish | bluish-whitish area | whitish patches | antrum and anguli | intestinal metaplasia(AA-NBI)       |
| 7                | Male   | 62      | Reddish | bluish-whitish area | whitish patches | antrum and anguli | intestinal metaplasia(AA-NBI,WLE)   |
| 8                | Male   | 53      | Reddish | bluish-whitish area | whitish patches | antrum            | intestinal metaplasia(AA-NBI)       |
| 9                | Male   | 62      | Reddish | bluish-whitish area | whitish patches | antrum            | intestinal metaplasia(AA-NBI,WLE)   |
| 10               | Male   | 73      | Reddish | bluish-whitish area | whitish patches | antrum            | intestinal metaplasia(AA-NBI,WLE)   |
| 11               | Male   | 48      | Rough   | bluish-whitish area | whitish patches | antrum and anguli | intestinal metaplasia(AA-NBI,WLE)   |
| 12               | Male   | 52      | Rough   | bluish-whitish area | whitish patches | antrum and anguli | intestinal metaplasia(AA-NBI,WLE)   |
| 13               | Male   | 48      | Rough   | bluish-whitish area | whitish patches | antrum            | intestinal metaplasia(AA-NBI,WLE)   |
| 14               | Male   | 62      | Rough   | bluish-whitish area | whitish patches | antrum            | intestinal metaplasia(AA-NBI,WLE)   |
| 15               | Male   | 60      | Reddish | bluish-whitish area | whitish patches | antrum            | intestinal metaplasia(AA-NBI,WLE)   |
| 16               | Male   | 51      | Reddish | bluish-whitish area | whitish patches | antrum            | low-grade intraepithelial neoplasia |
| 17               | Male   | 43      | Whitish | bluish-whitish area | whitish patches | antrum            | inflammation                        |
| 18               | Male   | 61      | Rough   | bluish-whitish area | whitish patches | antrum and anguli | inflammation                        |
| 19               | Male   | 40      | Rough   | bluish-whitish area | whitish patches | antrum and anguli | intestinal metaplasia(AA-NBI)       |
| 20               | Male   | 52      | Reddish | Normal              | whitish patches | antrum            | inflammation                        |
| 21               | Male   | 50      | Reddish | bluish-whitish area | whitish patches | antrum            | intestinal metaplasia(AA-NBI)       |
| 22               | Male   | 57      | Reddish | bluish-whitish area | whitish patches | antrum            | intestinal metaplasia(AA-NBI)       |
| 23               | Male   | 45      | Reddish | bluish-whitish area | whitish patches | antrum            | intestinal metaplasia(AA-NBI)       |
| 24               | Male   | 72      | Reddish | bluish-whitish area | whitish patches | antrum            | intestinal metaplasia(AA-NBI)       |
| 25               | Male   | 50      | Reddish | bluish-whitish area | whitish patches | antrum            | intestinal metaplasia(AA-NBI)       |
| 26               | Male   | 52      | Rough   | Normal              | whitish patches | antrum            | intestinal metaplasia(AA-NBI)       |
| 27               | Male   | 40      | Rough   | Normal              | whitish patches | antrum and anguli | intestinal metaplasia(AA-NBI)       |
| 28               | Male   | 43      | Normal  | Normal              | whitish patches | angulus           | intestinal metaplasia(AA-NBI)       |
| 29               | Male   | 44      | Reddish | Normal              | whitish patches | antrum            | inflammation                        |
| 30               | Male   | 61      | Reddish | Normal              | whitish patches | antrum and anguli | inflammation                        |
| 31               | Male   | 42      | Reddish | Normal              | whitish patches | antrum            | inflammation                        |
| 32               | Male   | 42      | Rough   | Normal              | Normal          | antrum            | inflammation                        |
| 33               | Male   | 47      | Rough   | Normal              | Normal          | antrum            | intestinal metaplasia (WLE)         |
| 34               | Male   | 40      | Normal  | Normal              | Normal          | antrum            | intestinal metaplasia (random)      |
| 35               | Male   | 70      | Normal  | Normal              | Normal          | antrum            | intestinal metaplasia (random)      |
| 36               | Male   | 71      | Normal  | Normal              | Normal          | antrum            | intestinal metaplasia (random)      |
| 37               | Male   | 41      | Reddish | Normal              | Normal          | antrum and anguli | inflammation                        |
| 38               | Male   | 40      | Reddish | Normal              | Normal          | antrum            | inflammation                        |
| 39               | Male   | 49      | Reddish | Normal              | Normal          | antrum            | inflammation                        |
| 40               | Male   | 63      | Reddish | Normal              | Normal          | antrum            | inflammation                        |
| 41               | Male   | 53      | Reddish | Normal              | Normal          | antrum            | inflammation                        |
| 42               | Male   | 47      | Reddish | Normal              | Normal          | antrum            | inflammation                        |
| 43               | Male   | 71      | Rough   | Normal              | Normal          | antrum            | intestinal metaplasia (WLE)         |
| 44               | Male   | 42      | Rough   | Normal              | Normal          | antrum            | inflammation                        |
| 45               | Male   | 54      | Rough   | Normal              | Normal          | antrum and anguli | inflammation                        |
| 46               | Male   | 51      | Rough   | Normal              | Normal          | antrum            | inflammation                        |
| 47               | Male   | 45      | Rough   | Normal              | Normal          | antrum            | inflammation                        |
| 48               | Male   | 40      | Rough   | Normal              | Normal          | antrum            | inflammation                        |
| 49               | Male   | 50      | Rough   | Normal              | Normal          | antrum            | inflammation                        |
| 50               | Male   | 43      | Normal  | Normal              | Normal          | antrum and anguli | inflammation                        |
| 51               | Male   | 51      | Normal  | Normal              | Normal          | antrum and anguli | inflammation                        |
| 52               | Male   | 42      | Normal  | Normal              | Normal          | antrum            | inflammation                        |
| 53               | Male   | 46      | Normal  | Normal              | Normal          | antrum            | inflammation                        |
| 54               | Female | 40      | Rough   | bluish-whitish area | whitish patches | antrum and anguli | intestinal metaplasia(AA-NBI)       |
| 55               | Female | 59      | Whitish | bluish-whitish area | whitish patches | antrum and anguli | intestinal metaplasia(AA-NBI,WLE)   |
| 56               | Female | 66      | Whitish | bluish-whitish area | whitish patches | antrum            | intestinal metaplasia(AA-NBI,WLE)   |
| 57               | Female | 58      | Whitish | bluish-whitish area | whitish patches | antrum            | intestinal metaplasia(AA-NBI,WLE)   |
| 58               | Female | 67      | Whitish | bluish-whitish area | whitish patches | antrum            | intestinal metaplasia(AA-NBI,WLE)   |
| 59               | Female | 69      | Whitish | bluish-whitish area | whitish patches | antrum and anguli | intestinal metaplasia(AA-NBI,WLE)   |
| 60               | Female | 46      | Whitish | bluish-whitish area | whitish patches | antrum            | intestinal metaplasia(AA-NBI,WLE)   |
| 61               | Female | 64      | Reddish | bluish-whitish area | whitish patches | antrum            | intestinal metaplasia(AA-NBI)       |
| 62               | Female | 69      | Reddish | bluish-whitish area | whitish patches | antrum            | intestinal metaplasia(AA-NBI)       |
| 63               | Female | 64      | Reddish | bluish-whitish area | whitish patches | antrum            | intestinal metaplasia(AA-NBI)       |
| 64               | Female | 50      | Reddish | bluish-whitish area | whitish patches | antrum and anguli | intestinal metaplasia(AA-NBI)       |
| 65               | Female | 60      | Reddish | bluish-whitish area | whitish patches | antrum            | intestinal metaplasia(AA-NBI)       |
| 66               | Female | 70      | Reddish | bluish-whitish area | whitish patches | antrum            | intestinal metaplasia(AA-NBI)       |
| 67               | Female | 66      | Reddish | bluish-whitish area | whitish patches | antrum            | intestinal metaplasia(AA-NBI)       |
| 68               | Female | 50      | Rough   | bluish-whitish area | whitish patches | antrum and anguli | intestinal metaplasia(AA-NBI)       |
| 69               | Female | 60      | Reddish | bluish-whitish area | whitish patches | antrum            | intestinal metaplasia(AA-NBI,WLE)   |
| 70               | Female | 52      | Reddish | bluish-whitish area | whitish patches | antrum            | intestinal metaplasia(AA-NBI)       |
| 71               | Female | 75      | Whitish | bluish-whitish area | whitish patches | antrum            | inflammation                        |
| 72               | Female | 68      | Rough   | bluish-whitish area | whitish patches | antrum            | inflammation                        |
| 73               | Female | 50      | Rough   | bluish-whitish area | whitish patches | antrum            | inflammation                        |
| 74               | Female | 44      | Normal  | bluish-whitish area | whitish patches | antrum and anguli | inflammation                        |
| 75               | Female | 41      | Normal  | Normal              | whitish patches | antrum and anguli | intestinal metaplasia(AA-NBI)       |
| 76               | Female | 42      | Rough   | Normal              | whitish patches | antrum            | inflammation                        |
| 77               | Female | 40      | Normal  | Normal              | whitish patches | antrum and anguli | inflammation                        |
| 78               | Female | 40      | Normal  | Normal              | whitish patches | antrum and anguli | intestinal metaplasia(AA-NBI)       |
| 79               | Female | 44      | Normal  | Normal              | whitish patches | antrum            | intestinal metaplasia(AA-NBI)       |
| 80               | Female | 51      | Normal  | Normal              | whitish patches | antrum            | intestinal metaplasia(AA-NBI)       |
| 81               | Female | 71      | Normal  | Normal              | whitish patches | antrum            | intestinal metaplasia(AA-NBI)       |
| 82               | Female | 42      | Normal  | Normal              | whitish patches | antrum            | intestinal metaplasia(AA-NBI)       |
| 83               | Female | 52      | Reddish | bluish-whitish area | whitish patches | antrum            | intestinal metaplasia(AA-NBI)       |
| 84               | Female | 45      | Reddish | bluish-whitish area | whitish patches | antrum            | intestinal metaplasia(AA-NBI)       |
| 85               | Female | 52      | Reddish | bluish-whitish area | whitish patches | antrum            | intestinal metaplasia(AA-NBI)       |
| 86               | Female | 57      | Reddish | bluish-whitish area | whitish patches | antrum and anguli | intestinal metaplasia(AA-NBI)       |
| 87               | Female | 46      | Reddish | bluish-whitish area | whitish patches | antrum            | intestinal metaplasia(AA-NBI)       |
| 88               | Female | 69      | Reddish | bluish-whitish area | whitish patches | antrum            | intestinal metaplasia(AA-NBI)       |
| 89               | Female | 59      | Reddish | Normal              | whitish patches | antrum            | intestinal metaplasia(AA-NBI)       |
| 90               | Female | 51      | Rough   | Normal              | whitish patches | antrum            | intestinal metaplasia(AA-NBI)       |
| 91               | Female | 51      | Normal  | Normal              | whitish patches | angulus           | intestinal metaplasia(AA-NBI)       |
| 92               | Female | 47      | Normal  | Normal              | whitish patches | antrum            | intestinal metaplasia(AA-NBI)       |
| 93               | Female | 44      | Normal  | Normal              | whitish patches | antrum            | intestinal metaplasia(AA-NBI)       |
| 94               | Female | 65      | Reddish | Normal              | whitish patches | antrum            | inflammation                        |
| 95               | Female | 56      | Reddish | Normal              | whitish patches | antrum            | inflammation                        |
| 96               | Female | 51      | Rough   | Normal              | whitish patches | antrum            | inflammation                        |
| 97               | Female | 69      | Rough   | Normal              | whitish patches | antrum and anguli | inflammation                        |
| 98               | Female | 51      | Rough   | Normal              | whitish patches | antrum            | inflammation                        |
| 99               | Female | 50      | Normal  | Normal              | whitish patches | angulus           | inflammation                        |
| 100              | Female | 42      | Normal  | Normal              | whitish patches | angulus           | inflammation                        |
| 101              | Female | 57      | Normal  | Normal              | whitish patches | antrum            | inflammation                        |
| 102              | Female | 44      | Reddish | Normal              | Normal          | antrum            | inflammation                        |
| 103              | Female | 51      | Rough   | Normal              | Normal          | antrum and anguli | inflammation                        |
| 104              | Female | 52      | Normal  | Normal              | Normal          | antrum            | inflammation                        |
| 105              | Female | 44      | Normal  | Normal              | Normal          | antrum and anguli | intestinal metaplasia (random)      |
| 106              | Female | 71      | Normal  | Normal              | Normal          | antrum            | intestinal metaplasia (random)      |
| 107              | Female | 73      | Normal  | Normal              | Normal          | antrum            | intestinal metaplasia (random)      |
| 108              | Female | 44      | Reddish | Normal              | Normal          | antrum            | inflammation                        |
| 109              | Female | 52      | Reddish | Normal              | Normal          | antrum            | inflammation                        |
| 110              | Female | 66      | Reddish | Normal              | Normal          | antrum            | inflammation                        |
| 111              | Female | 62      | Reddish | Normal              | Normal          | antrum and anguli | inflammation                        |
| 112              | Female | 56      | Reddish | Normal              | Normal          | antrum and anguli | inflammation                        |
| 113              | Female | 46      | Reddish | Normal              | Normal          | antrum and anguli | inflammation                        |
| 114              | Female | 65      | Reddish | Normal              | Normal          | antrum and anguli | inflammation                        |
| 115              | Female | 57      | Reddish | Normal              | Normal          | antrum            | inflammation                        |
| 116              | Female | 80      | Reddish | Normal              | Normal          | antrum            | inflammation                        |
| 117              | Female | 60      | Reddish | Normal              | Normal          | antrum            | inflammation                        |
| 118              | Female | 60      | Reddish | Normal              | Normal          | antrum            | inflammation                        |
| 119              | Female | 49      | Reddish | Normal              | Normal          | antrum            | inflammation                        |
| 120              | Female | 40      | Rough   | Normal              | Normal          | antrum and anguli | inflammation                        |
| 121              | Female | 40      | Rough   | Normal              | Normal          | antrum            | inflammation                        |
| 122              | Female | 41      | Rough   | Normal              | Normal          | antrum            | inflammation                        |
| 123              | Female | 57      | Rough   | Normal              | Normal          | antrum            | inflammation                        |
| 124              | Female | 45      | Normal  | Normal              | Normal          | antrum            | inflammation                        |
| 125              | Female | 53      | Normal  | Normal              | Normal          | antrum            | inflammation                        |
| 126              | Female | 40      | Normal  | Normal              | Normal          | antrum and anguli | inflammation                        |
| 127              | Female | 57      | Normal  | Normal              | Normal          | angulus           | inflammation                        |
| 128              | Female | 46      | Normal  | Normal              | Normal          | antrum and anguli | inflammation                        |
| 129              | Female | 61      | Normal  | Normal              | Normal          | antrum            | inflammation                        |
| 130              | Female | 64      | Normal  | Normal              | Normal          | antrum            | inflammation                        |
| 131              | Female | 52      | Normal  | Normal              | Normal          | antrum            | inflammation                        |
| 132              | Female | 50      | Normal  | Normal              | Normal          | antrum and anguli | inflammation                        |
